# Supplementary material for: Lactate facilitated mitochondrial fission-derived ROS to promote pulmonary fibrosis via ERK/DRP-1 signaling
Source: PubMed Central journal article supplement (PMC11106888; doi:10.1186/s12967-024-05289-2), 2024-05-21
Supplement: 12967_2024_5289_MOESM1_ESM.pdf [file 12967_2024_5289_MOESM1_ESM.pdf]

# Supplemental

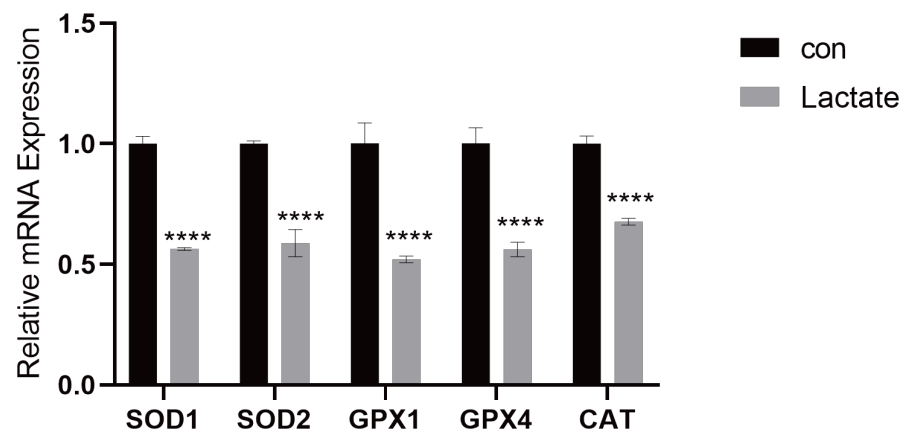

Figure S1. SOD1, SOD2 GPX1, GPX4 and CAT were measured by RT-qPCR after lactate treatment 24h.

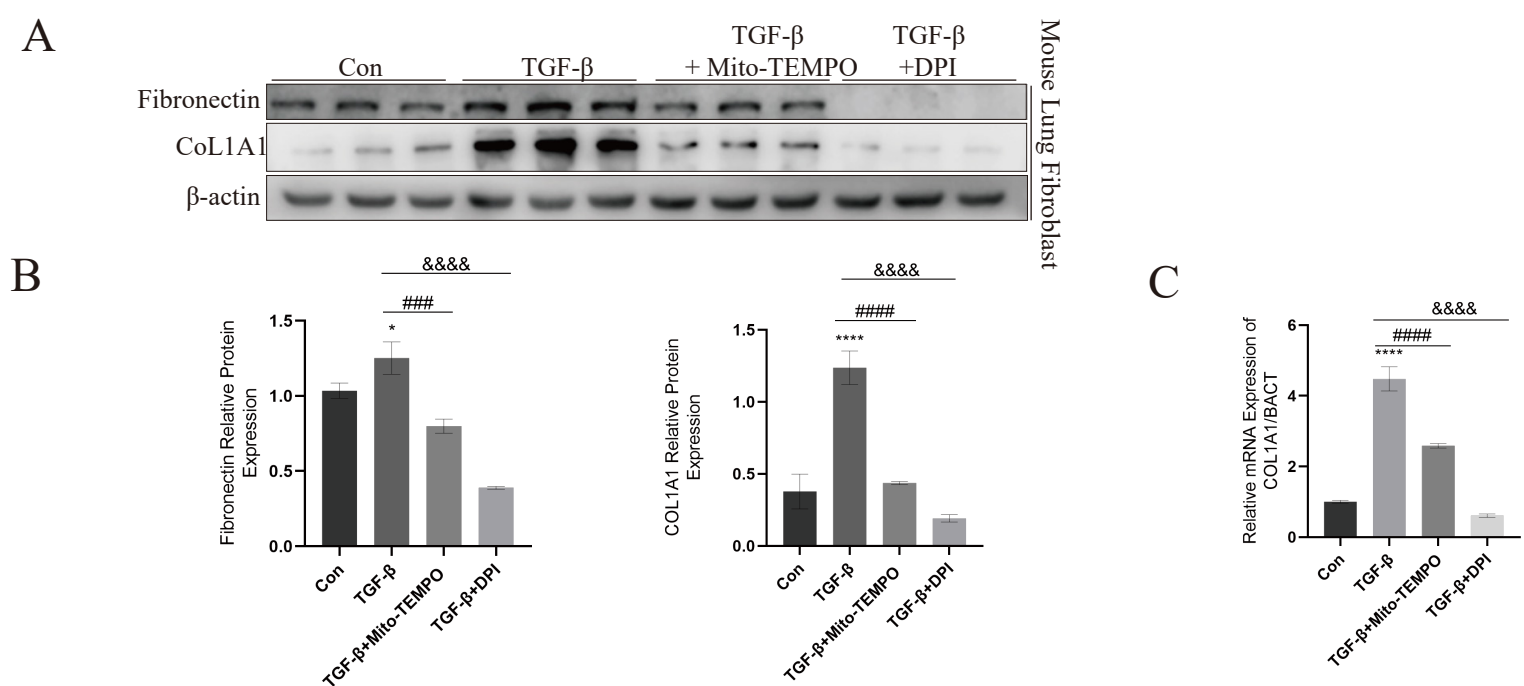

Figure S2. (A-B) Fibronectin and COL1A1 were detected in primary mouse lung fibroblasts by WB with control group, TGF- $\beta$  group, TGF- $\beta$ + MT group and TGF- $\beta$ +DPI group. (C) Relative mRNA of COL1A1 in primary mouse lung fibroblasts was detected.

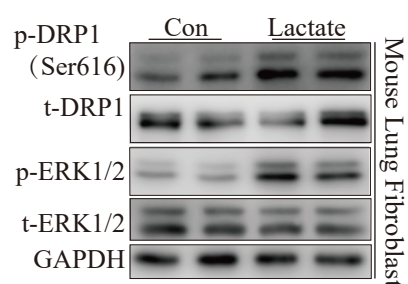

Figure S3 Primary mouse lung fibroblasts were treated lactate for 30 minutes, p-DRP1S616 and p-ERK1/2 was determined by WB.

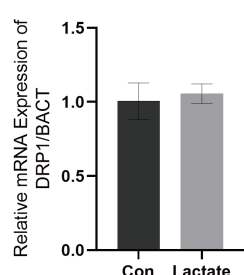

Figure S4 The expression of DRP1 mRNA in MRCS treated with lactate for 12h was determined

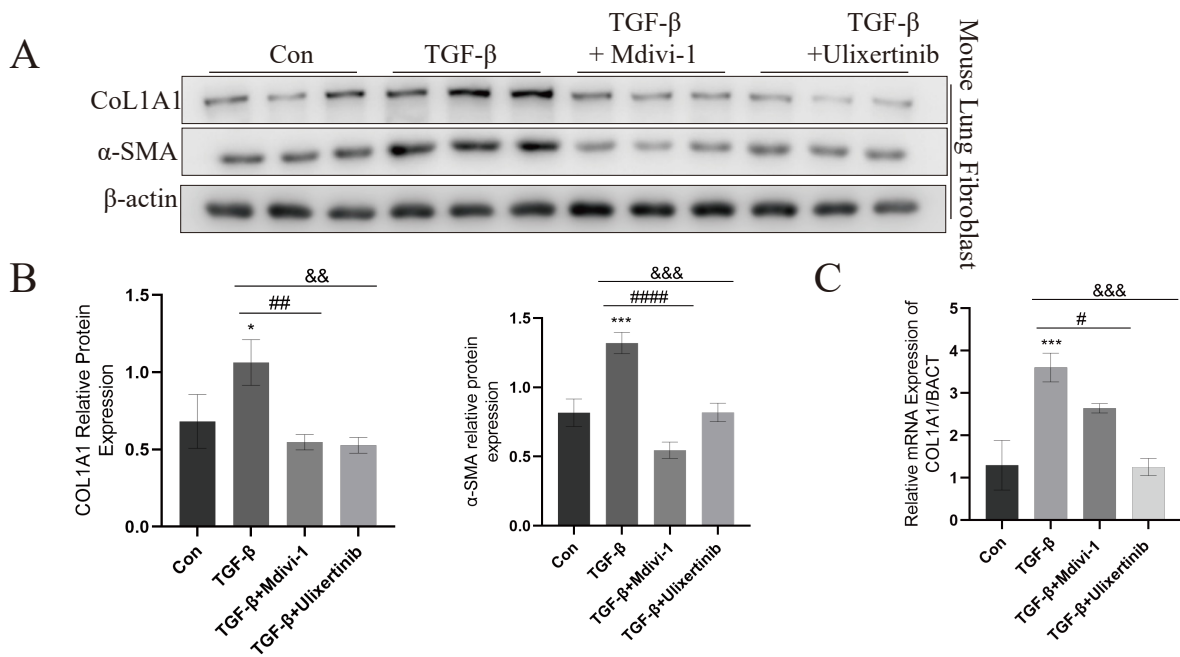

Figure S5. (A-B)  $\alpha$ -SMA and COL1A1 were detected in primary mouse lung fibroblasts by WB with control group, TGF- $\beta$  group, TGF- $\beta$ + Mdivi-1 group and TGF- $\beta$ + Ulixertinib group. (C) Relative mRNA of COL1A1 in primary mouse lung fibroblasts was detected.

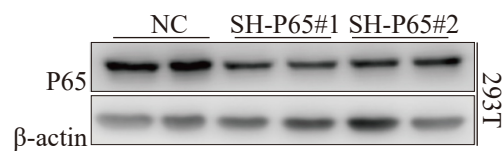

Figure S6. Western blotting results showed the effect of P65 knockdown in 293T cells.
